# Supplementary material for: Impact of Extending Hard-Cheese Ripening: A Multiparameter Characterization of Parmigiano Reggiano Cheese Ripened up to 50 Months
Source: PubMed Central journal article supplement (PMC7143483; doi:10.3390/foods9030268), 2020-03-02
Supplement: foods-09-00268-s001.pdf [file foods-09-00268-s001.pdf]

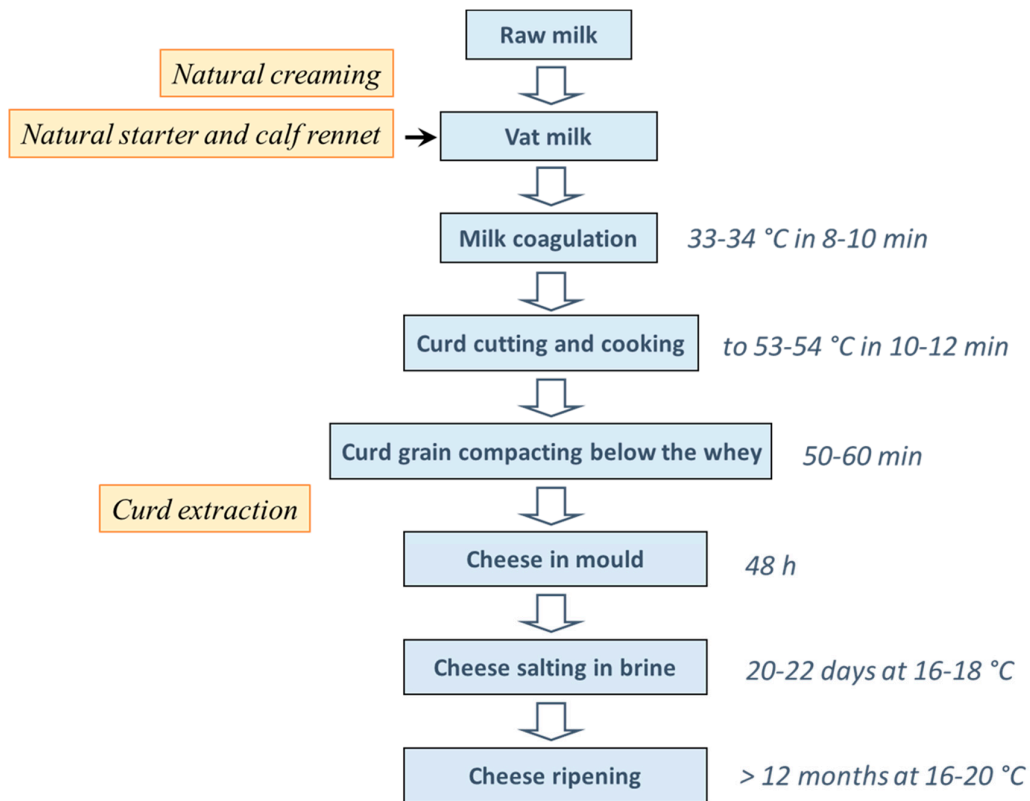

Figure S1 Parmigiano Reggiano manufacture process and ripening conditions adopted at the cheese factories involved in this study.

Table S1. Free amino acid (FAA) composition (g/100 g FAA) of Parmigiano-Reggiano cheeses ripened up to 50 months. Results are expressed as mean  $\pm$  standard deviation.

| Ripening time (months) | Asp             | Thr             | Ser             | Asn             | Glu              | Gln             | Gly             | Ala             | Cit             | Val             | Met             | Ile             | Leu             | Tyr             | Phe             | Gaba            | Om              | Lys              | His             | Arg             | Pro             |
|------------------------|-----------------|-----------------|-----------------|-----------------|------------------|-----------------|-----------------|-----------------|-----------------|-----------------|-----------------|-----------------|-----------------|-----------------|-----------------|-----------------|-----------------|------------------|-----------------|-----------------|-----------------|
| 12                     | 3.86 $\pm$ 0.03 | 3.52 $\pm$ 0.05 | 6.01 $\pm$ 0.05 | 4.05 $\pm$ 0.03 | 17.04 $\pm$ 0.26 | 0.81 $\pm$ 0.04 | 2.25 $\pm$ 0.03 | 2.62 $\pm$ 0.03 | 3.31 $\pm$ 0.05 | 7.33 $\pm$ 0.05 | 2.32 $\pm$ 0.06 | 6.26 $\pm$ 0.26 | 8.52 $\pm$ 0.12 | 3.6 $\pm$ 0.19  | 4.96 $\pm$ 0.08 | 0 $\pm$ 0       | 0.9 $\pm$ 0.02  | 10.3 $\pm$ 0.05  | 2.66 $\pm$ 0.04 | 0.67 $\pm$ 0.01 | 9 $\pm$ 0.16    |
| 18                     | 4.44 $\pm$ 0.56 | 2.99 $\pm$ 0.06 | 6.36 $\pm$ 0.12 | 3.33 $\pm$ 0.44 | 16.76 $\pm$ 0.33 | 0.4 $\pm$ 0.04  | 2.64 $\pm$ 0.11 | 2.84 $\pm$ 0.05 | 3.37 $\pm$ 0.17 | 7.56 $\pm$ 0.22 | 2.33 $\pm$ 0.06 | 6.46 $\pm$ 0.12 | 8.18 $\pm$ 0.18 | 3.37 $\pm$ 0.14 | 4.67 $\pm$ 0.23 | 0.2 $\pm$ 0.22  | 0.96 $\pm$ 0.08 | 10.68 $\pm$ 0.17 | 2.77 $\pm$ 0.14 | 0.24 $\pm$ 0.27 | 9.44 $\pm$ 0.20 |
| 24                     | 4.2 $\pm$ 0.42  | 3.8 $\pm$ 0.07  | 6.92 $\pm$ 0.06 | 3.83 $\pm$ 0.36 | 16.16 $\pm$ 0.42 | 0.15 $\pm$ 0.16 | 2.16 $\pm$ 0.03 | 2.69 $\pm$ 0.04 | 0.85 $\pm$ 0.08 | 7.67 $\pm$ 0.18 | 2.37 $\pm$ 0.06 | 6.38 $\pm$ 0.09 | 7.99 $\pm$ 0.27 | 3.32 $\pm$ 0.25 | 4.47 $\pm$ 0.13 | 0.53 $\pm$ 0.24 | 0.16 $\pm$ 0.06 | 10.36 $\pm$ 0.16 | 2.86 $\pm$ 0.02 | 3.65 $\pm$ 0.39 | 9.46 $\pm$ 0.27 |
| 30                     | 4.18 $\pm$ 0.1  | 2.2 $\pm$ 0.11  | 7.12 $\pm$ 0.28 | 3.83 $\pm$ 0.06 | 16.6 $\pm$ 0.49  | 0.07 $\pm$ 0.07 | 3.28 $\pm$ 0.15 | 2.89 $\pm$ 0.09 | 2.47 $\pm$ 0.15 | 7.73 $\pm$ 0.24 | 2.65 $\pm$ 0.26 | 6.69 $\pm$ 0.39 | 8.43 $\pm$ 0.44 | 2.78 $\pm$ 1.09 | 4.68 $\pm$ 0.07 | 0 $\pm$ 0       | 1.52 $\pm$ 0.03 | 10.63 $\pm$ 0.62 | 2.31 $\pm$ 0.04 | 0 $\pm$ 0       | 9.96 $\pm$ 0.30 |
| 40                     | 4.8 $\pm$ 0.24  | 3.74 $\pm$ 0.06 | 7.53 $\pm$ 0.05 | 3.52 $\pm$ 0.03 | 16.7 $\pm$ 0.1   | 0 $\pm$ 0       | 2.26 $\pm$ 0.07 | 2.71 $\pm$ 0.02 | 2.3 $\pm$ 0.75  | 7.63 $\pm$ 0.22 | 2.28 $\pm$ 0.14 | 6.3 $\pm$ 0.13  | 7.72 $\pm$ 0.65 | 2.88 $\pm$ 0.36 | 4.63 $\pm$ 0.06 | 0.1 $\pm$ 0.11  | 0.34 $\pm$ 0.07 | 10.48 $\pm$ 0.13 | 2.61 $\pm$ 0.05 | 2.06 $\pm$ 1.12 | 9.42 $\pm$ 0.21 |
| 50                     | 7.11 $\pm$ 0.11 | 2.77 $\pm$ 0.07 | 7.48 $\pm$ 0.20 | 0.73 $\pm$ 0.02 | 16.16 $\pm$ 0.5  | 0 $\pm$ 0       | 2.71 $\pm$ 0.09 | 2.75 $\pm$ 0.06 | 2.11 $\pm$ 0.02 | 7.55 $\pm$ 0.11 | 2.83 $\pm$ 0.37 | 7.21 $\pm$ 0.72 | 9.01 $\pm$ 0.39 | 2.96 $\pm$ 0.16 | 4.46 $\pm$ 0.16 | 0.64 $\pm$ 0.15 | 1.81 $\pm$ 0.09 | 10.13 $\pm$ 0.34 | 2.24 $\pm$ 0.05 | 0 $\pm$ 0       | 9.36 $\pm$ 0.32 |

Table S2. Number of tyrosine crystals and spots counted on a surface of 100 cm<sup>2</sup> in Parmigiano-Reggiano cheeses ripened up to 50 months.

| Ripening<br>time<br>(months) | Tyrosine<br>crystals | Spots |
|------------------------------|----------------------|-------|
| 12                           | 92                   | 0     |
| 18                           | 42                   | 182   |
| 24                           | 53                   | 415   |
| 30                           | 98                   | 332   |
| 40                           | 55                   | 277   |
| 50                           | 59                   | 590   |

---

Table S3. Correlation coefficients between compositional, rheological and chemical parameters. The asterisks indicate the significance levels (\* $p < 0.05$ ; \*\*  $p < 0.01$ ; \*\*\* $p < 0.001$ ).

|                            | Moisture | Fat    | Protein | MNFS     | Hardness | FAA      | $\alpha 1$ -<br>$1/\alpha 1$ | $\Sigma\gamma/\Sigma\beta$ | Number<br>of fat<br>globules | Porosity | Butanoic<br>acid | Hexanoic<br>acid | Heptanoic<br>acid | Octanoic<br>acid | Total<br>VOCs |
|----------------------------|----------|--------|---------|----------|----------|----------|------------------------------|----------------------------|------------------------------|----------|------------------|------------------|-------------------|------------------|---------------|
| Moisture                   | 1.000    |        |         |          |          |          |                              |                            |                              |          |                  |                  |                   |                  |               |
| Fat                        | -0.782   | 1.000  |         |          |          |          |                              |                            |                              |          |                  |                  |                   |                  |               |
| Protein                    | -0.089   | -0.534 | 1.000   |          |          |          |                              |                            |                              |          |                  |                  |                   |                  |               |
| MNFS                       | 0.929*   | -0.498 | -0.445  | 1.000    |          |          |                              |                            |                              |          |                  |                  |                   |                  |               |
| Hardness                   | -0.950** | 0.651  | 0.197   | -0.931*  | 1.000    |          |                              |                            |                              |          |                  |                  |                   |                  |               |
| FAA                        | -0.890*  | 0.769  | -0.102  | -0.773   | 0.939*   | 1.000    |                              |                            |                              |          |                  |                  |                   |                  |               |
| $\alpha 1$ - $1/\alpha 1$  | 0.837    | -0.755 | 0.126   | 0.708    | -0.904*  | -0.980** | 1.000                        |                            |                              |          |                  |                  |                   |                  |               |
| $\Sigma\gamma/\Sigma\beta$ | -0.963** | 0.655  | 0.219   | -0.950** | 0.972**  | 0.866*   | -0.803                       | 1.000                      |                              |          |                  |                  |                   |                  |               |
| Number of fat<br>globules  | 0.672    | -0.674 | 0.197   | 0.526    | -0.744   | -0.877*  | 0.945*                       | -0.588                     | 1.000                        |          |                  |                  |                   |                  |               |
| Porosity                   | -0.891*  | 0.768  | -0.105  | -0.775   | 0.916*   | 0.988*** | -0.956**                     | 0.840                      | -0.867*                      | 1.000    |                  |                  |                   |                  |               |
| Butanoic acid              | -0.952** | 0.701  | 0.108   | -0.908*  | 0.934*   | 0.858*   | -0.767                       | 0.981**                    | -0.530                       | 0.844*   | 1.000            |                  |                   |                  |               |
| Hexanoic acid              | -0.952** | 0.756  | 0.040   | -0.875*  | 0.932*   | 0.863*   | -0.794                       | 0.979**                    | -0.565                       | 0.832*   | 0.987**          | 1.000            |                   |                  |               |
| Heptanoic acid             | -0.762   | 0.611  | -0.036  | -0.687   | 0.875*   | 0.873*   | -0.845                       | 0.858*                     | -0.652                       | 0.801    | 0.848            | 0.880*           | 1.000             |                  |               |
| Octanoic acid              | -0.518   | 0.012  | 0.526   | -0.700   | 0.634    | 0.518    | -0.390                       | 0.636                      | -0.194                       | 0.544    | 0.658            | 0.546            | 0.535             | 1.000            |               |
| Total VOCs                 | -0.954** | 0.753  | 0.046   | -0.881*  | 0.938*   | 0.870*   | -0.801                       | 0.981**                    | -0.574                       | 0.840*   | 0.988***         | 1.000***         | 0.882*            | 0.556            | 1.000         |
